# Supplementary material for: Dysregulated miRNA and mRNA Expression Affect Overlapping Pathways in a Huntington’s Disease Model
Source: MDPI journal article supplement (doi:10.3390/ijms241511942), 2023-07-26
Supplement: s1 [file s1]

## Supplementary material

### **Dysregulated miRNA and mRNA expression affect overlapping pathways in a Huntington's disease model**

Nóra Zsindely<sup>1,2</sup>, Gábor Nagy<sup>2</sup>, Fruzsina Siági<sup>2,3</sup>, Anita Farkas<sup>2,3</sup>, and László Bodai<sup>2,\*</sup>

1 Department of Genetics, Faculty of Science and Informatics, University of Szeged, H-6726 Szeged, Hungary; zsindizsn@yahoo.com

2 Department of Biochemistry and Molecular Biology, Faculty of Science and Informatics, University of Szeged, H-6726 Szeged, Közép fasor 52, Hungary

3 Doctoral School in Biology, Faculty of Science and Informatics, University of Szeged, H-6726 Szeged, Hungary

\* Correspondence: bodai@bio.u-szeged.hu (L.B.)

**Supplementary table S1.** Characteristics of the small RNA sequencing results of the samples used in the study.

| <b>Sample</b> | <b>Total input reads<sup>1</sup></b> | <b>miRNA reads<sup>2</sup></b> | <b>Unique miRNAs<sup>3</sup></b> |
|---------------|--------------------------------------|--------------------------------|----------------------------------|
| Q25-1         | 1 904 347                            | 410 788                        | 176                              |
| Q25-2         | 2 757 414                            | 866 899                        | 196                              |
| Q25-3         | 3 858 180                            | 1 079 675                      | 198                              |
| Q25-4         | 3 271 900                            | 1 169 939                      | 207                              |
| Q25-5         | 2 475 567                            | 968 037                        | 199                              |
| Q25-6         | 3 121 385                            | 1 185 153                      | 211                              |
| Q25-7         | 3 230 513                            | 1 123 290                      | 209                              |
| Q120-1        | 3 113 643                            | 922 047                        | 200                              |
| Q120-2        | 3 143 193                            | 1 041 266                      | 197                              |
| Q120-3        | 3 309 411                            | 1 157 384                      | 195                              |
| Q120-4        | 2 066 826                            | 1 033 405                      | 185                              |
| Q120-5        | 3 376 384                            | 1 102 404                      | 202                              |
| Q120-6        | 3 680 203                            | 1 240 629                      | 206                              |
| Q120-7        | 2 878 210                            | 997 835                        | 200                              |
| Q120-8        | 2 742 327                            | 872 116                        | 193                              |

1: Total number of sequence reads per sample available for bioinformatic analysis. 2: The number of sequence reads representing miRNAs per sample. 3: The number of unique miRNA species identified per sample.

**Supplementary table S2.** Top 10 human disease terms showing the statistically most significant enrichments in the miRNA target gene set.

| <b>Disease term</b>                  | <b>Overlap<sup>1</sup></b> | <b>Adjusted P value<sup>2</sup></b> |
|--------------------------------------|----------------------------|-------------------------------------|
| Tauopathy                            | 144/188                    | $1.52 \times 10^{-19}$              |
| Huntington's disease                 | 111/136                    | $3.59 \times 10^{-19}$              |
| Alzheimer's disease                  | 77/87                      | $1.14 \times 10^{-17}$              |
| cancer                               | 66/74                      | $1.17 \times 10^{-15}$              |
| neurodegenerative disease            | 115/157                    | $9.36 \times 10^{-14}$              |
| autosomal dominant cerebellar ataxia | 66/85                      | $4.86 \times 10^{-10}$              |
| Parkinson's disease                  | 78/105                     | $4.86 \times 10^{-10}$              |
| amyotrophic lateral sclerosis        | 53/65                      | $1.22 \times 10^{-9}$               |
| viral infectious disease             | 40/47                      | $1.7 \times 10^{-8}$                |
| Epstein-Barr virus hepatitis         | 36/42                      | $5.55 \times 10^{-8}$               |

1: Number of overlapping genes in the target gene set and the disease term set / number of genes in the disease term set. 2: P-value of Fisher's exact test adjusted using the Benjamini-Hochberg method for correction for multiple hypotheses testing.

**Supplementary Table S3.** Top 10 Gene Ontology Molecular Function terms showing the statistically most significant enrichments in the miRNA target gene set.

| Gene ontology term                                                                                                    | Overlap <sup>1</sup> | Adjusted P value <sup>2</sup> |
|-----------------------------------------------------------------------------------------------------------------------|----------------------|-------------------------------|
| DNA binding (GO:0003677)                                                                                              | 335/448              | $3.29 \times 10^{-41}$        |
| protein kinase activity (GO:0004672)                                                                                  | 187/228              | $6.03 \times 10^{-32}$        |
| RNA polymerase II regulatory region sequence-specific DNA binding (GO:0000977)                                        | 165/200              | $7.12 \times 10^{-29}$        |
| sequence-specific DNA binding (GO:0043565)                                                                            | 163/197              | $7.12 \times 10^{-29}$        |
| transcription regulatory region sequence-specific DNA binding (GO:0000976)                                            | 165/204              | $4.73 \times 10^{-27}$        |
| ubiquitin-protein transferase activity (GO:0004842)                                                                   | 180/231              | $6.71 \times 10^{-26}$        |
| transcription factor activity, RNA polymerase II core promoter proximal region sequence-specific binding (GO:0000982) | 116/134              | $4.71 \times 10^{-24}$        |
| RNA binding (GO:0003723)                                                                                              | 271/401              | $3.12 \times 10^{-22}$        |
| protein serine/threonine kinase activity (GO:0004674)                                                                 | 135/172              | $5.99 \times 10^{-20}$        |
| RNA polymerase II regulatory region DNA binding (GO:0001012)                                                          | 105/127              | $1.26 \times 10^{-18}$        |

1: Number of overlapping genes in the target gene set and the GO term set / number of genes in the GO term set.

2: P-value of Fisher's exact test adjusted using the Benjamini-Hochberg method for correction for multiple hypotheses testing.

**Supplementary table S4.** The number of mRNA-sequencing reads per sample.

| Sample | Total input<br>reads <sup>1</sup> |
|--------|-----------------------------------|
| Q25-1  | 5 388 896                         |
| Q25-2  | 7 244 627                         |
| Q25-3  | 6 359 422                         |
| Q25-4  | 6 489 262                         |
| Q120-1 | 6 294 197                         |
| Q120-2 | 6 877 695                         |
| Q120-3 | 6 093 111                         |
| Q120-4 | 6 093 786                         |

1: Total number of sequence reads per sample available for bioinformatic analysis.
